# Supplementary material for: Magnetic-targeting of polyethylenimine-wrapped iron oxide nanoparticle labeled chondrocytes in a rabbit articular cartilage defect model
Source: Royal Society of Chemistry journal article supplement (doi:10.1039/c7ra12039g), 2018-01-01
Supplement: c7ra12039g1.pdf [file c7ra12039g1.pdf]

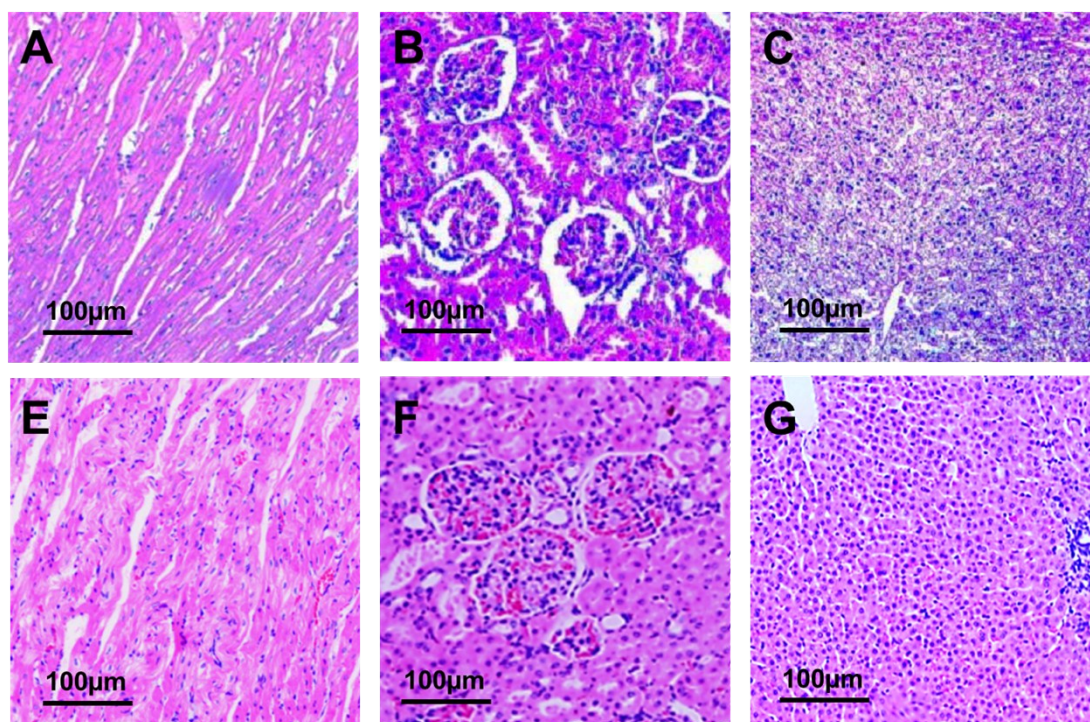

Supplementary Fig. 1 Toxicity examination results on the animal's internal organ from magnetic-targeting and control groups. Representative images of H&E staining for heart (A&E), kidney (B&F), and liver (C&G) of animal in magnetic-targeting group (upper panel) and control group (lower panel).
